# Supplementary material for: The Impact of High-Frequency Trading on Modern Securities Markets
Source: Springer Nature journal article supplement (doi:10.1007/s12599-022-00768-6), 2022-09-23
Supplement: MOESM1 [file 23534038]

# **The Impact of High-Frequency Trading on Modern Securities Markets – An Analysis Based on a Technical Interruption**

**Benjamin Clapham, Martin Haferkorn, Kai Zimmermann**

Business & Information Systems Engineering (2022)

**Appendix (available online via <http://link.springer.com>)**

## Appendix

**Table 5** Constituents of the DAX30 and the CAC40 stock index during our observation period, which are analyzed in this study.

| DAX30     |                                     | CAC40     |                              |
|-----------|-------------------------------------|-----------|------------------------------|
| RIC       | Company Name                        | RIC       | Company Name                 |
| ADSGn.DE  | Adidas AG                           | ACCP.PA   | Accor SA                     |
| ALVG.DE   | Allianz SE                          | AIR.PA*   | Airbus SE                    |
| BASFn.DE  | BASF SE                             | AIRP.PA*  | Air Liquide SA               |
| BAYGn.DE  | Bayer AG                            | ATOS.PA*  | Atos SE                      |
| BEIG.DE   | Beiersdorf AG                       | AXAF.PA*  | AXA SA                       |
| BMWG.DE   | Bayerische Motoren Werke AG         | BNPP.PA*  | BNP Paribas SA               |
| CBKG.DE   | Commerzbank AG                      | BOUY.PA*  | Bouygues SA                  |
| CONG.DE   | Continental AG                      | CAGR.PA   | Credit Agricole SA           |
| DAIGn.DE  | Daimler AG                          | CAPP.PA*  | Capgemini SE                 |
| DB1Gn.DE  | Deutsche Börse AG                   | CARR.PA*  | Carrefour SA                 |
| DBKGn.DE  | Deutsche Bank AG                    | DANO.PA   | Danone SA                    |
| DPWGn.DE  | Deutsche Post AG                    | ENGIE.PA* | Engie SA                     |
| DTEGn.DE  | Deutsche Telekom AG                 | ESSI.PA*  | Essilor International SA     |
| EONGn.DE  | E.ON SE                             | EXHO.PA*  | Sodexo SA                    |
| FMEG.DE   | Fresenius Medical Care AG & Co KGaA | FTL.PA*   | TechnipFMC PLC               |
| FREG.DE   | Fresenius SE & Co KGaA              | LEGD.PA   | Legrand SA                   |
| HEIG.DE   | HeidelbergCement AG                 | LHN.PA    | LafargeHolcim Ltd            |
| HNKG_p.DE | Henkel AG & Co KGaA (pref.)         | LVMH.PA*  | LVMH SE                      |
| IFXGn.DE  | Infineon Technologies AG            | MICP.PA*  | Michelin SCA                 |
| LHAG.DE   | Deutsche Lufthansa AG               | MT.AS*    | ArcelorMittal SA             |
| LING.DE   | Linde AG                            | ORAN.PA*  | Orange SA                    |
| MRCG.DE   | Merck KGaA                          | OREP.PA*  | L'Oréal SA                   |
| MUVGn.DE  | Münchener Rückversicherungs AG      | PERP.PA*  | Pernod Ricard SA             |
| PSMGn.DE  | Prosieben Media                     | PEUP.PA*  | Peugeot SA                   |
| RWEG.DE   | RWE AG                              | PRTP.PA*  | Kering SA                    |
| SAPG.DE   | SAP SE                              | PUBP.PA   | Publicis Groupe SA           |
| SIEGn.DE  | Siemens AG                          | RENA.PA*  | Renault SA                   |
| TKAG.DE   | Thyssenkrupp AG                     | SAF.PA*   | Safran SA                    |
| VNAn.DE   | Vonovia SE                          | SASY.PA*  | Sanofi SA                    |
| VOWG_p.DE | Volkswagen AG (pref.)               | SCHN.PA*  | Schneider Electric SE        |
|           |                                     | SGEF.PA*  | Vinci SA                     |
|           |                                     | SJOB.PA   | Compagnie de Saint Gobain SA |
|           |                                     | SOGN.PA*  | Societe Generale SA          |
|           |                                     | SOLB.BR   | Solvay SA                    |
|           |                                     | STM.PA*   | STMicroelectronics NV        |
|           |                                     | TOTF.PA*  | Total SA                     |
|           |                                     | UNBP.AS*  | Unibail Rodamco SE           |
|           |                                     | VIE.PA*   | Veolia Environnement SA      |
|           |                                     | VIV.PA    | Vivendi SA                   |
|           |                                     | VLOF.PA   | Valeo SA                     |

*Note:* RIC represents the Reuters Instrument Code; (pref.) indicates preference shares; \* denotes that the respective CAC40 stock is included in the matched pairs sample

**Table 6** Descriptive statistics for the DAX30 stocks traded on Xetra. This table provides descriptive statistics for the 30 stocks of the treatment group during our observation period of the first hour of trading on the event day as well as on four non-event days. Market quality and trading activity variables are aggregated into one-minute intervals so that the descriptive statistics are based on 8,990 observations. L1-Volume, Depth(10), and trading volume are reported in 1,000 euro. Trade price and midpoint standard deviation are denoted in bps. Control variables are calculated on a daily basis and are, thus, based on 150 observations. Market capitalization and daily trading volume are reported in 1,000,000 euro.

| Variable                 | Mean   | Median | Std. Dev. | Min   | Max      |
|--------------------------|--------|--------|-----------|-------|----------|
| <i>Market Quality</i>    |        |        |           |       |          |
| Spread                   | 5.07   | 4.58   | 2.58      | 1.30  | 27.45    |
| L1-Volume                | 98.20  | 52.14  | 113.73    | 4.29  | 1,456.99 |
| Depth(10)                | 768.15 | 603.97 | 586.55    | 0.00  | 4,800.66 |
| Order Imbalance          | 0.23   | 0.20   | 0.13      | 0.00  | 0.98     |
| S.D. Price               | 2.12   | 1.82   | 2.06      | 0.00  | 55.04    |
| S.D. Midpoint            | 2.13   | 1.75   | 1.77      | 0.00  | 50.84    |
| <i>Trading Activity</i>  |        |        |           |       |          |
| Trades                   | 10.78  | 7.00   | 12.03     | 0.00  | 237.00   |
| Volume                   | 177.59 | 88.13  | 275.88    | 0.00  | 7,217.68 |
| Quotes                   | 112.25 | 90.00  | 91.72     | 0.00  | 1,282.00 |
| Submissions              | 174.25 | 145.00 | 130.49    | 0.00  | 1,802.00 |
| <i>Control Variables</i> |        |        |           |       |          |
| Market Cap               | 42,299 | 29,829 | 30,307    | 6,510 | 117,261  |
| Closing Price            | 84.02  | 84.81  | 59.84     | 9.21  | 215.55   |
| Daily Volume             | 83.85  | 71.48  | 47.04     | 15.65 | 242.57   |
| High-to-Low              | 1.01   | 1.01   | 0.01      | 1.00  | 1.04     |

**Table 7** Descriptive statistics for the CAC40 stocks traded on Euronext Paris. This table provides descriptive statistics for the 40 stocks of the control group during our observation period of the first hour of trading on the event day as well as on four non-event days. Market quality and trading activity variables are aggregated into one-minute intervals so that the descriptive statistics are based on 12,000 observations (11,820 for Depth(10), order imbalance, and number of submissions). L1-Volume, Depth(10), and trading volume are reported in 1,000 euro. Trade price and midpoint standard deviation are denoted in bps. Control variables are calculated on a daily basis and are, thus, based on 200 observations. Market capitalization and daily trading volume are reported in 1,000,000 euro.

| Variable                 | Mean   | Median | Std. Dev. | Min    | Max      |
|--------------------------|--------|--------|-----------|--------|----------|
| <i>Market Quality</i>    |        |        |           |        |          |
| Spread                   | 4.91   | 4.46   | 2.44      | 1.14   | 27.40    |
| L1-Volume                | 81.57  | 64.78  | 56.57     | 8.12   | 1,112.25 |
| Depth(10)                | 644.47 | 542.62 | 424.50    | 2.73   | 2,698.77 |
| Order Imbalance          | 0.20   | 0.17   | 0.11      | 0.02   | 0.85     |
| S.D. Price               | 1.79   | 1.53   | 1.85      | 0.00   | 33.91    |
| S.D. Midpoint            | 2.07   | 1.74   | 1.68      | 0.00   | 24.94    |
| <i>Trading Activity</i>  |        |        |           |        |          |
| Trades                   | 17.55  | 11.00  | 23.23     | 0.00   | 458.00   |
| Volume                   | 129.75 | 61.61  | 223.73    | 0.00   | 4,297.17 |
| Quotes                   | 153.18 | 125.00 | 118.52    | 0.00   | 1,260.00 |
| Submissions              | 185.63 | 149.00 | 168.17    | 0.00   | 3,742.00 |
| <i>Control Variables</i> |        |        |           |        |          |
| Market Cap               | 37,263 | 27,572 | 29,161    | 10,503 | 121,905  |
| Closing Price            | 79.72  | 66.50  | 65.77     | 13.78  | 313.85   |
| Daily Volume             | 68.76  | 53.92  | 60.17     | 6.11   | 494.39   |
| High-to-Low              | 1.01   | 1.01   | 0.01      | 1.00   | 1.04     |

**Table 8** Regression results explaining changes in liquidity and volatility due to the interruption of HFT based on the matched pairs sub-sample (equally sized treatment and control group). *Spread*, *S.D. Price*, and *S.D. Midpoint* are in bps, *L1-Volume* and *Depth(10)* are in 1,000 euro. *Event* is dummy variable being one for the trading day on which HFT was interrupted, *DAX* is a dummy variable being one if a stock is a constituent of the DAX30, and *Day* represents the different observation days.

|                           | Spread              | L1-Volume            | Depth(10)               | Order Imb.          | S.D. Price           | S.D. Mid             |
|---------------------------|---------------------|----------------------|-------------------------|---------------------|----------------------|----------------------|
| Event                     | -0.085<br>(-0.741)  | -7.290<br>(-1.844*)  | -26.858<br>(-1.783*)    | -0.001<br>(-0.093)  | -0.232<br>(-2.230**) | -0.243<br>(-2.383**) |
| Day                       | -0.007<br>(-0.243)  | -2.586<br>(-2.331**) | -32.033<br>(-4.161***)  | -0.001<br>(-0.406)  | 0.031<br>(1.202)     | 0.044<br>(1.796*)    |
| DiD<br>(Event · DAX)      | 1.043<br>(6.003***) | -9.487<br>(-1.339)   | -204.724<br>(-4.393***) | 0.067<br>(6.106***) | 0.339<br>(2.265**)   | 0.168<br>(1.207)     |
| Time Trend<br>(Day · DAX) | 0.036<br>(0.797)    | -2.382<br>(-1.081)   | -20.110<br>(-1.821*)    | 0.002<br>(0.601)    | -0.065<br>(-1.853*)  | -0.052<br>(-1.595)   |
| Controls                  | yes                 | yes                  | yes                     | yes                 | yes                  | yes                  |
| Observations              | 17,990              | 17,990               | 17,870                  | 17,870              | 17,990               | 17,990               |
| R <sup>2</sup>            | 0.556               | 0.096                | 0.467                   | 0.298               | 0.184                | 0.176                |
| Adjusted R <sup>2</sup>   | 0.553               | 0.090                | 0.463                   | 0.293               | 0.178                | 0.170                |
| F Statistic               | 334.133***          | 28.456***            | 232.167***              | 112.581***          | 60.075***            | 57.055***            |

*Note:* t-statistics in parentheses; \*p<0.1; \*\*p<0.05; \*\*\*p<0.01

**Table 9** Regression results explaining changes in trading activity due to the interruption of HFT based on the matched pairs sub-sample (equally sized treatment and control group). *Trades*, *Quotes*, and *Submissions* are in number of occurrences, *Volume* is in 1,000 euro. *Event* is dummy variable being one for the trading day on which HFT was interrupted, *DAX* is a dummy variable being one if a stock is a constituent of the DAX30, and *Day* represents the different observation days.

|                           | Trades               | Volume                | Quotes                 | Submissions            |
|---------------------------|----------------------|-----------------------|------------------------|------------------------|
| Event                     | -1.811<br>(-1.198)   | -19.037<br>(-1.250)   | -40.064<br>(-6.262***) | -50.763<br>(-6.345***) |
| Day                       | 0.977<br>(1.862*)    | 7.785<br>(1.588)      | -0.764<br>(-0.297)     | 2.730<br>(0.448)       |
| DiD<br>(Event · DAX)      | -0.869<br>(-0.563)   | 6.873<br>(0.375)      | -3.520<br>(-0.519)     | -5.094<br>(-0.542)     |
| Time Trend<br>(Day · DAX) | -1.486<br>(-2.395**) | -17.040<br>(-2.374**) | -6.058<br>(-1.995**)   | -9.128<br>(-1.344)     |
| Controls                  | yes                  | yes                   | yes                    | yes                    |
| Observations              | 17,990               | 17,990                | 17,990                 | 17,870                 |
| R <sup>2</sup>            | 0.074                | 0.051                 | 0.141                  | 0.131                  |
| Adjusted R <sup>2</sup>   | 0.068                | 0.044                 | 0.135                  | 0.125                  |
| F Statistic               | 21.680***            | 14.412***             | 43.815***              | 39.889***              |

*Note:* t-statistics in parentheses; \*p<0.1; \*\*p<0.05; \*\*\*p<0.01

**Table 10** Effect size of changes in market quality net of changes in trading activity based on the matched pairs sub-sample. *Non-Event Value* provides market quality and trading activity measures for DAX30 stocks on non-event days (these numbers are identical for the full and the matched sample since only the control stocks change). *DiD-Coefficient* reports the  $\beta_1$ -coefficient from Equation (7). *Percentage Change* is calculated by comparing the DiD-coefficient with the corresponding non-event value. *Net Effect* provides the percentage change for each market quality measure net of the change in trading activity measured by the number of trades and quotes. Coefficients printed in bold are significant at the 10%-level.

|                     | Trades      | Volume    | Quotes         | Submissions |             |          |
|---------------------|-------------|-----------|----------------|-------------|-------------|----------|
| Non-Event Value     | 11.06       | 177.24    | 117.86         | 181.49      |             |          |
| DiD-Coefficient     | -0.87       | 6.87      | -3.52          | -5.09       |             |          |
| Percentage Change   | -7.86%      | 3.88%     | -2.99%         | -2.81%      |             |          |
|                     | Spread      | L1-Volume | Depth(10)      | Order Imb.  | S.D. Price  | S.D. Mid |
| Non-Event Value     | 4.90        | 101.00    | 813.85         | 0.21        | 2.06        | 2.12     |
| DiD-Coefficient     | <b>1.04</b> | -9.49     | <b>-204.72</b> | <b>0.07</b> | <b>0.34</b> | 0.17     |
| Percentage Change   | 21.28%      | -9.39%    | -25.15%        | 31.63%      | 16.48%      | 7.94%    |
| Net Effect (Trades) | 13.42%      | -1.53%    | -17.29%        | 23.77%      | 8.62%       | 0.08%    |
| Net Effect (Quotes) | 18.29%      | -6.40%    | -22.16%        | 28.64%      | 13.49%      | 4.95%    |

**Table 11** Results of the DiD-analysis with matched stocks based on Equation (7) when dividing the sample into thirds according to market capitalization of the stocks. For brevity and better comparison, this table only reports the DiD-coefficient  $Event \cdot DAX$  of each regression model. Panel A reports the results for changes in liquidity and volatility due to the interruption of HFT and Panel B reports those for changes in trading activity. *Spread*, *S.D. Price*, and *S.D. Midpoint* are in bps, *L1-Volume*, *Depth(10)*, and *Volume* are in 1,000 euro, *Trades*, *Quotes*, and *Submissions* are in number of occurrences.

| <i>Panel A</i>                                                        |                     |                       |                         |                       |                     |                    |
|-----------------------------------------------------------------------|---------------------|-----------------------|-------------------------|-----------------------|---------------------|--------------------|
|                                                                       | Spread              | L1-Volume             | Depth(10)               | Order Imb.            | S.D. Price          | S.D. Mid           |
| Largest Third<br>(Event · DAX)                                        | 0.553<br>(4.181***) | -12.447<br>(-0.919)   | -212.249<br>(-1.783*)   | 0.070<br>(4.192***)   | 0.175<br>(1.053)    | 0.001<br>(0.011)   |
| Medium Third<br>(Event · DAX)                                         | 1.217<br>(4.805***) | -15.194<br>(-2.013**) | -270.987<br>(-6.269***) | 0.090<br>(6.169***)   | 0.577<br>(2.588***) | 0.463<br>(2.296**) |
| Smallest Third<br>(Event · DAX)                                       | 1.340<br>(3.167***) | 7.419<br>(0.585)      | -82.614<br>(-2.964***)  | 0.051<br>(2.100**)    | 0.100<br>(0.364)    | -0.114<br>(-0.448) |
| <i>Panel B</i>                                                        |                     |                       |                         |                       |                     |                    |
|                                                                       | Trades              | Volume                | Quotes                  | Submissions           |                     |                    |
| Largest Third<br>(Event · DAX)                                        | -1.236<br>(-0.331)  | 1.913<br>(0.044)      | -7.902<br>(-0.649)      | -14.496<br>(-1.144)   |                     |                    |
| Medium Third<br>(Event · DAX)                                         | -0.483<br>(-0.203)  | 20.527<br>(0.908)     | -9.932<br>(-0.963)      | -3.206<br>(-0.171)    |                     |                    |
| Smallest Third<br>(Event · DAX)                                       | -2.058<br>(-1.105)  | -5.892<br>(-0.268)    | -4.357<br>(-0.435)      | -24.375<br>(-2.066**) |                     |                    |
| <i>Note:</i> t-statistics in parentheses; *p<0.1; **p<0.05; ***p<0.01 |                     |                       |                         |                       |                     |                    |

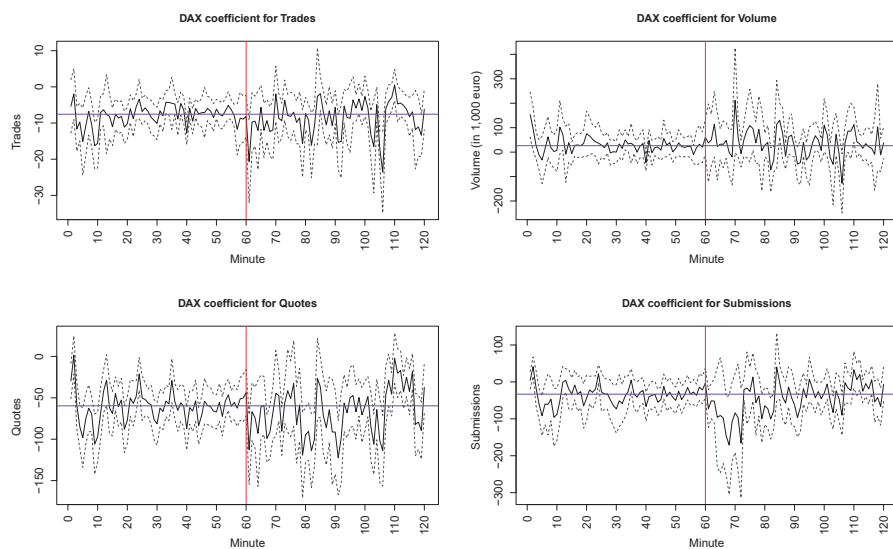

This figure illustrates the  $\beta_1$ -coefficient from Equation (6), i.e., the minute-wise cross-sectional differences between treatment (DAX30) and control group (CAC40), for each minute of the first hour of trading on non-event days (minutes 1 to 60) and the event day (minutes 61 to 120) separated by the red line. Dependent variables are *Trades*, *Volume*, *Quotes*, and *Submissions*. The purple line represents the median coefficient for non-event days and the dotted lines represent the upper and lower bounds of the 95%-confidence interval.

**Fig. 2** Changes in trading activity due to the interruption of HFT (minute-wise regressions).

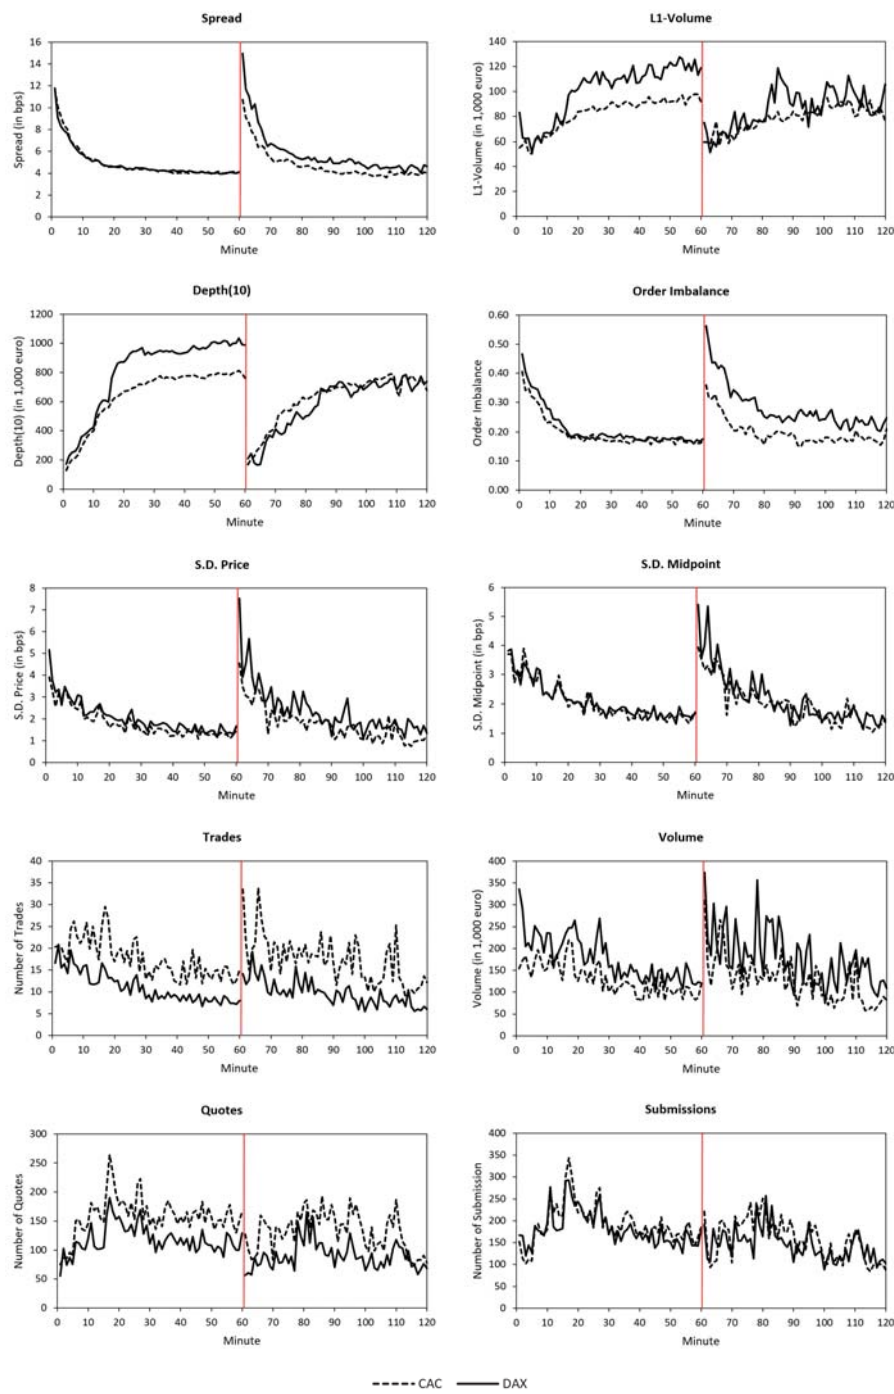

This figure plots the analyzed market quality and trading activity measures for DAX30 and CAC40 stocks averaged for each minute of the first hour of trading on non-event days (minutes 1 to 60) and the event day (minutes 61 to 120) separated by the red line.

**Fig. 3** Market quality and trading activity during the first hour of trading on non-event days and the event day.
